# Supplementary figures and images for: Studies of dynamics of physical agent ecosystems
Source: MDPI journal article supplement (doi:10.3390/ani12202759), 2002-09-04

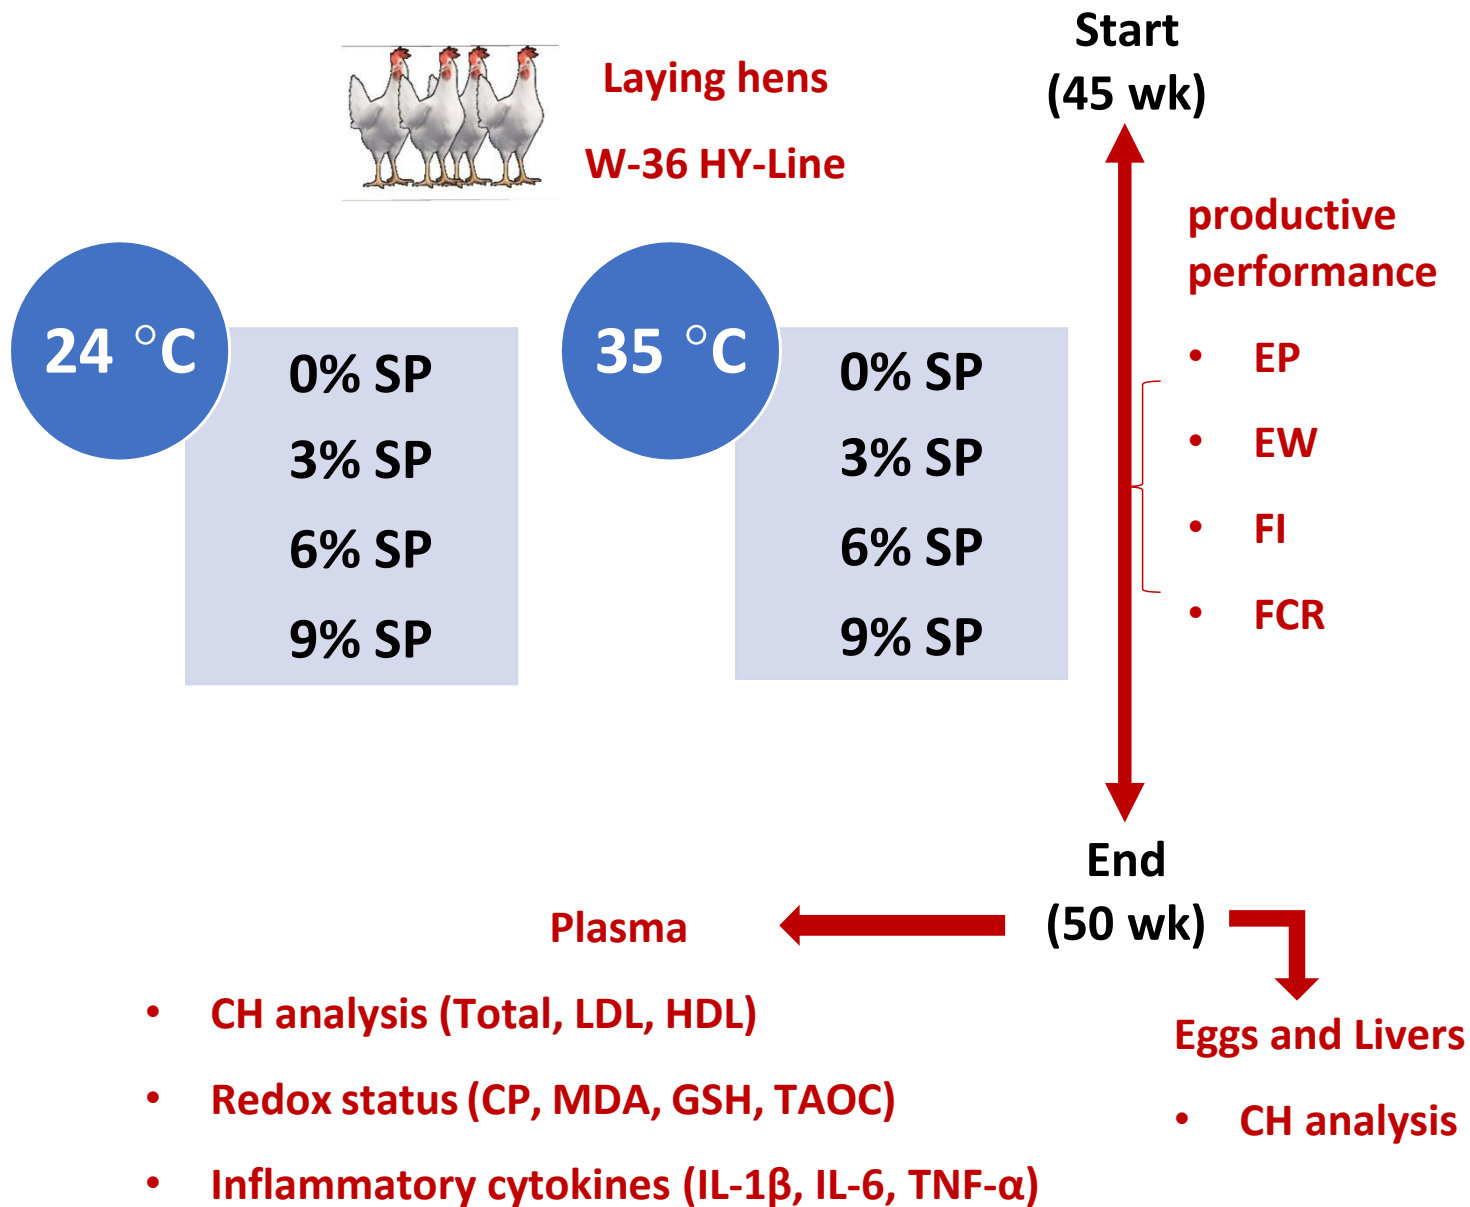

Figure S1: A scheme for the experimental design

Supplement: s1 [file s1]
